# Supplementary material
Source: PubMed Central journal article supplement (PMC4789983)
Supplement: ging856112.ww2_default.pdf [file ging856112.ww2_default.pdf]

## Appendix 4

Annual costs, effects and cost-effectiveness of interventions in cervical cancer control (cost and effects discounted and effects age-weighted)

| Intervention                                          | Costs per capita (I\$) | DALYS averted (per mln people) | Cost per DALY |           |
|-------------------------------------------------------|------------------------|--------------------------------|---------------|-----------|
|                                                       |                        |                                | ACER          | ICER      |
| <b>World sub-region Afr-E</b>                         |                        |                                |               |           |
| <b>Current Scenario</b>                               | 0.06                   | 24                             | 2,703         | Dominated |
| <b>50% coverage</b>                                   |                        |                                |               |           |
| Pap (1,20,65)*                                        | 0.66                   | 198                            | 3,340         | Dominated |
| Pap (3,20,65)*                                        | 0.48                   | 170                            | 2,808         | Dominated |
| VIA (40)*                                             | 0.05                   | 88                             | 555           | Dominated |
| Rx                                                    | 0.08                   | 188                            | 405           | Dominated |
| Pap (1,20,65)* + Rx                                   | 0.73                   | 403                            | 1,821         | Dominated |
| Pap (3,20,65)* + Rx                                   | 0.56                   | 378                            | 1,470         | Dominated |
| VIA (40)* + Rx                                        | 0.16                   | 487                            | 335           | Dominated |
| Pap (5,20,65)*                                        | 0.32                   | 156                            | 2,074         | Dominated |
| Pap (5,20,65)* + Rx                                   | 0.40                   | 364                            | 1,110         | Dominated |
| Pap (1,20,30) then Pap & HPV (1,30,65)                | 1.38                   | 208                            | 6,652         | Dominated |
| Pap (1,20,30) then Pap & HPV (1,30,65) + Rx           | 1.39                   | 413                            | 3,370         | Dominated |
| Pap (3,20,30) then Pap & HPV (3,30,65)                | 0.74                   | 185                            | 4,028         | Dominated |
| Pap (3,20,30) then Pap & HPV (3,30,65) + Rx           | 0.80                   | 391                            | 2,040         | Dominated |
| Pap (5,20,30) then Pap & HPV (5,30,65)                | 0.49                   | 175                            | 2,779         | Dominated |
| Pap (5,20,30) then Pap & HPV (5,30,65) + Rx           | 0.56                   | 382                            | 1,470         | Dominated |
| Pap (35,40,45)*.                                      | 0.07                   | 126                            | 575           | Dominated |
| Pap (35,40,45)* + Rx.                                 | 0.19                   | 528                            | 362           | Dominated |
| HPV (35,40,45)*.                                      | 0.20                   | 139                            | 1,427         | Dominated |
| HPV (35,40,45)* + Rx                                  | 0.30                   | 502                            | 607           | Dominated |
| VIA (35,40,45)                                        | 0.11                   | 136                            | 792           | Dominated |
| VIA (35,40,45)* + Rx                                  | 0.21                   | 499                            | 428           | Dominated |
| Pap (40)*                                             | 0.03                   | 78                             | 414           | Dominated |
| Pap (40)* + Rx                                        | 0.15                   | 478                            | 307           | 307       |
| HPV (40)*                                             | 0.08                   | 93                             | 875           | Dominated |
| HPV (40)* + Rx                                        | 0.19                   | 491                            | 391           | Dominated |
| HPVAC(12), \$0.60/vaccine dose                        | 0.05                   | 129                            | 355           | Dominated |
| HPVAC (12), \$0.60/vaccine dose + Rx                  | 0.15                   | 308                            | 489           | Dominated |
| HPVAC (12), \$2.00/vaccine dose                       | 0.09                   | 129                            | 693           | Dominated |
| HPVAC (12), \$2.00/vaccine dose + Rx                  | 0.20                   | 308                            | 642           | Dominated |
| Pap(1,20,65)*+HPVAC (12,\$.60)                        | 0.64                   | 259                            | 2,464         | Dominated |
| Pap(3,20,65)*+HPVAC (12,\$.60)                        | 0.49                   | 244                            | 2,028         | Dominated |
| VIA(40)*+HPVAC (12), \$.60)                           | 0.08                   | 165                            | 507           | Dominated |
| Pap(1,20,65)*+HPVAC (12, \$.60) + Rx                  | 0.71                   | 429                            | 1,657         | Dominated |
| Pap(3,20,65)*+HPVAC (12, \$.60) + Rx                  | 0.57                   | 415                            | 1,368         | Dominated |
| VIA(40)*+HPVAC (12, \$.60) + Rx                       | 0.18                   | 341                            | 526           | Dominated |
| Pap(5,20,65)*+HPVAC (12, \$.60)                       | 0.35                   | 233                            | 1,488         | Dominated |
| Pap(5,20,65)*+HPVAC (12, \$.60) + Rx                  | 0.43                   | 405                            | 1,054         | Dominated |
| Pap (1,20,30) & Pap/HPV(1,30,65)*+HPVAC (12,\$.60)    | 1.36                   | 266                            | 5,105         | Dominated |
| Pap (1,20,30) & Pap/HPV(1,30,65)*+HPVAC (12,\$.60)+Rx | 1.43                   | 436                            | 3,275         | Dominated |
| Pap (3,20,30) & Pap/HPV(3,30,65)*+HPVAC (12,\$.60)    | 0.78                   | 254                            | 3,080         | Dominated |
| Pap (3,20,30) & Pap/HPV(3,30,65)*+HPVAC (12,\$.60)+Rx | 0.85                   | 425                            | 2,010         | Dominated |
| Pap (5,20,30) & Pap/HPV(5,30,65)*+HPVAC (12,\$.60)    | 0.53                   | 247                            | 2,123         | Dominated |
| Pap (5,20,30) & Pap/HPV(5,30,65)*+HPVAC (12,\$.60)+Rx | 0.60                   | 418                            | 1,432         | Dominated |
| Pap (35,40,45)* +HPVAC (12,\$.60)                     | 0.11                   | 188                            | 588           | Dominated |
| Pap (35,40,45)* +HPVAC (12,\$.60)+Rx                  | 0.21                   | 362                            | 583           | Dominated |

|                                                       |      |     |       |           |
|-------------------------------------------------------|------|-----|-------|-----------|
| HPV (35,40,45)* +HPVAC (12,\$.60)                     | 0.24 | 195 | 1,218 | Dominated |
| HPV (35,40,45)* +HPVAC (12,\$.60)+Rx                  | 0.33 | 368 | 886   | Dominated |
| VIA (35,40,45)* +HPVAC (12,\$.60)                     | 0.24 | 193 | 1,251 | Dominated |
| VIA (35,40,45)* +HPVAC (12,\$.60)+Rx                  | 0.24 | 366 | 649   | Dominated |
| Pap (40)* +HPVAC (12,\$.60)                           | 0.07 | 161 | 441   | Dominated |
| Pap (40)* +HPVAC (12,\$.60)+Rx                        | 0.17 | 337 | 494   | Dominated |
| HPV (40)* +HPVAC (12,\$.60)                           | 0.12 | 167 | 700   | Dominated |
| HPV (40)* +HPVAC (12,\$.60)+Rx                        | 0.21 | 343 | 620   | Dominated |
| <b>80% coverage</b>                                   |      |     |       |           |
| Pap (1,20,65)*                                        | 1.05 | 317 | 3,313 | Dominated |
| Pap (3,20,65)*                                        | 0.61 | 273 | 2,237 | Dominated |
| VIA (40)*                                             | 0.06 | 141 | 398   | Dominated |
| Rx                                                    | 0.17 | 426 | 403   | Dominated |
| Pap (1,20,65)* + Rx                                   | 1.21 | 708 | 1,703 | Dominated |
| Pap (3,20,65)* + Rx                                   | 0.78 | 672 | 1,154 | Dominated |
| VIA (40)* + Rx                                        | 0.28 | 662 | 428   | Dominated |
| Pap (5,20,65)*                                        | 0.40 | 249 | 1,618 | Dominated |
| Pap (5,20,65)* + Rx                                   | 0.58 | 652 | 887   | Dominated |
| Pap (1,20,30) then Pap & HPV (1,30,65)                | 2.20 | 332 | 6,622 | Dominated |
| Pap (1,20,30) then Pap & HPV (1,30,65) + Rx           | 2.25 | 724 | 3,103 | Dominated |
| Pap (3,20,30) then Pap & HPV (3,30,65)                | 1.00 | 296 | 3,397 | Dominated |
| Pap (3,20,30) then Pap & HPV (3,30,65) + Rx           | 1.10 | 693 | 1,592 | Dominated |
| Pap (5,20,30) then Pap & HPV (5,30,65)                | 0.64 | 280 | 2,298 | Dominated |
| Pap (5,20,30) then Pap & HPV (5,30,65) + Rx           | 0.81 | 679 | 1,187 | Dominated |
| Pap (35,40,45)*.                                      | 0.10 | 201 | 491   | Dominated |
| Pap (35,40,45)* + Rx.                                 | 0.33 | 713 | 469   | Dominated |
| HPV (35,40,45)*.                                      | 0.28 | 223 | 1,268 | Dominated |
| HPV (35,40,45)* + Rx                                  | 0.49 | 711 | 695   | Dominated |
| VIA (35,40,45)                                        | 0.12 | 217 | 569   | Dominated |
| VIA (35,40,45)* + Rx                                  | 0.34 | 706 | 475   | Dominated |
| Pap (40)*                                             | 0.04 | 125 | 339   | Dominated |
| Pap (40)* + Rx                                        | 0.27 | 649 | 418   | Dominated |
| HPV (40)*                                             | 0.11 | 148 | 755   | Dominated |
| HPV (40)* + Rx                                        | 0.34 | 668 | 502   | Dominated |
| HPVAC(12), \$0.60/vaccine dose                        | 0.07 | 207 | 337   | Dominated |
| HPVAC (12), \$0.60/vaccine dose + Rx                  | 0.31 | 599 | 510   | Dominated |
| HPVAC (12), \$2.00/vaccine dose                       | 0.14 | 207 | 675   | Dominated |
| HPVAC (12), \$2.00/vaccine dose + Rx                  | 0.38 | 599 | 635   | Dominated |
| Pap(1,20,65)*+HPVAC (12,\$.60)                        | 1.00 | 415 | 2,417 | Dominated |
| Pap(3,20,65)*+HPVAC (12,\$.60)                        | 0.63 | 390 | 1,621 | Dominated |
| VIA(40)*+HPVAC (12), \$.60)                           | 0.11 | 265 | 422   | Dominated |
| Pap(1,20,65)*+HPVAC (12, \$.60) + Rx                  | 1.16 | 774 | 1,498 | Dominated |
| Pap(3,20,65)*+HPVAC (12, \$.60) + Rx                  | 0.79 | 754 | 1,053 | Dominated |
| VIA(40)*+HPVAC (12, \$.60) + Rx                       | 0.32 | 646 | 498   | Dominated |
| Pap(5,20,65)*+HPVAC (12, \$.60)                       | 0.44 | 374 | 1,178 | Dominated |
| Pap(5,20,65)*+HPVAC (12, \$.60) + Rx                  | 0.61 | 739 | 829   | Dominated |
| Pap (1,20,30) & Pap/HPV(1,30,65)*+HPVAC (12,\$.60)    | 2.15 | 426 | 5,057 | Dominated |
| Pap (1,20,30) & Pap/HPV(1,30,65)*+HPVAC (12,\$.60)+Rx | 2.30 | 785 | 2,935 | Dominated |
| Pap (3,20,30) & Pap/HPV(3,30,65)*+HPVAC (12,\$.60)    | 1.06 | 407 | 2,618 | Dominated |
| Pap (3,20,30) & Pap/HPV(3,30,65)*+HPVAC (12,\$.60)+Rx | 1.22 | 769 | 1,585 | Dominated |
| Pap (5,20,30) & Pap/HPV(5,30,65)*+HPVAC (12,\$.60)    | 0.70 | 396 | 1,778 | Dominated |
| Pap (5,20,30) & Pap/HPV(5,30,65)*+HPVAC (12,\$.60)+Rx | 0.86 | 759 | 1,138 | Dominated |
| Pap (35,40,45)* +HPVAC (12,\$.60)                     | 0.16 | 302 | 527   | Dominated |
| Pap (35,40,45)* +HPVAC (12,\$.60)+Rx                  | 0.38 | 676 | 561   | Dominated |
| HPV (35,40,45)* +HPVAC (12,\$.60)                     | 0.34 | 312 | 1,100 | Dominated |
| HPV (35,40,45)* +HPVAC (12,\$.60)+Rx                  | 0.54 | 684 | 790   | Dominated |

|                                                       |      |       |       |           |
|-------------------------------------------------------|------|-------|-------|-----------|
| VIA (35,40,45)* +HPVAC (12,\$.60)                     | 0.35 | 309   | 1,123 | Dominated |
| VIA (35,40,45)* +HPVAC (12,\$.60)+Rx                  | 0.38 | 682   | 564   | Dominated |
| Pap (40)* +HPVAC (12,\$.60)                           | 0.10 | 258   | 398   | Dominated |
| Pap (40)* +HPVAC (12,\$.60)+Rx                        | 0.31 | 640   | 490   | Dominated |
| HPV (40)* +HPVAC (12,\$.60)                           | 0.17 | 267   | 634   | Dominated |
| HPV (40)* +HPVAC (12,\$.60)+Rx                        | 0.38 | 648   | 585   | Dominated |
| <b>95% coverage</b>                                   |      |       |       |           |
| Pap (1,20,65)*                                        | 1.32 | 376   | 3,502 | Dominated |
| Pap (3,20,65)*                                        | 0.70 | 324   | 2,166 | Dominated |
| VIA (40)*                                             | 0.06 | 168   | 369   | Dominated |
| Rx                                                    | 0.25 | 626   | 401   | 702       |
| Pap (1,20,65)* + Rx                                   | 1.54 | 917   | 1,681 | Dominated |
| Pap (3,20,65)* + Rx                                   | 0.94 | 879   | 1,069 | Dominated |
| VIA (40)* + Rx                                        | 0.37 | 784   | 475   | Dominated |
| Pap (5,20,65)*                                        | 0.46 | 296   | 1,552 | Dominated |
| Pap (5,20,65)* + Rx                                   | 0.71 | 856   | 830   | Dominated |
| Pap (1,20,30) then Pap & HPV (1,30,65)                | 2.68 | 395   | 6,802 | Dominated |
| Pap (1,20,30) then Pap & HPV (1,30,65) + Rx           | 2.75 | 935   | 2,941 | Dominated |
| Pap (3,20,30) then Pap & HPV (3,30,65)                | 1.15 | 351   | 3,283 | Dominated |
| Pap (3,20,30) then Pap & HPV (3,30,65) + Rx           | 1.28 | 901   | 1,421 | Dominated |
| Pap (5,20,30) then Pap & HPV (5,30,65)                | 0.73 | 333   | 2,206 | Dominated |
| Pap (5,20,30) then Pap & HPV (5,30,65) + Rx           | 0.97 | 886   | 1,091 | Dominated |
| Pap (35,40,45)*.                                      | 0.12 | 239   | 484   | Dominated |
| Pap (35,40,45)* + Rx.                                 | 0.44 | 836   | 522   | Dominated |
| HPV (35,40,45)*.                                      | 0.33 | 265   | 1,239 | Dominated |
| HPV (35,40,45)* + Rx                                  | 0.62 | 849   | 728   | Dominated |
| VIA (35,40,45)                                        | 0.13 | 258   | 524   | Dominated |
| VIA (35,40,45)* + Rx                                  | 0.43 | 844   | 505   | Dominated |
| Pap (40)*                                             | 0.05 | 149   | 328   | Dominated |
| Pap (40)* + Rx                                        | 0.36 | 770   | 471   | Dominated |
| HPV (40)*                                             | 0.13 | 176   | 732   | Dominated |
| HPV (40)* + Rx                                        | 0.44 | 790   | 552   | Dominated |
| HPVAC(12), \$0.60/vaccine dose                        | 0.08 | 245   | 333   | Dominated |
| HPVAC (12), \$0.60/vaccine dose + Rx                  | 0.43 | 813   | 523   | Dominated |
| HPVAC (12), \$2.00/vaccine dose                       | 0.16 | 245   | 670   | Dominated |
| HPVAC (12), \$2.00/vaccine dose + Rx                  | 0.51 | 813   | 633   | Dominated |
| Pap(1,20,65)*+HPVAC (12,\$.60)                        | 1.24 | 493   | 2,510 | Dominated |
| Pap(3,20,65)*+HPVAC (12,\$.60)                        | 0.72 | 464   | 1,553 | Dominated |
| VIA(40)*+HPVAC (12), \$.60)                           | 0.13 | 314   | 404   | Dominated |
| Pap(1,20,65)*+HPVAC (12, \$.60) + Rx                  | 1.46 | 1,003 | 1,456 | 27,139    |
| Pap(3,20,65)*+HPVAC (12, \$.60) + Rx                  | 0.95 | 982   | 970   | 12,425    |
| VIA(40)*+HPVAC (12, \$.60) + Rx                       | 0.43 | 862   | 500   | 972       |
| Pap(5,20,65)*+HPVAC (12, \$.60)                       | 0.50 | 444   | 1,122 | Dominated |
| Pap(5,20,65)*+HPVAC (12, \$.60) + Rx                  | 0.75 | 965   | 772   | 3,906     |
| Pap (1,20,30) & Pap/HPV(1,30,65)*+HPVAC (12,\$.60)    | 2.60 | 506   | 5,147 | Dominated |
| Pap (1,20,30) & Pap/HPV(1,30,65)*+HPVAC (12,\$.60)+Rx | 2.82 | 1,017 | 2,773 | 100,075   |
| Pap (3,20,30) & Pap/HPV(3,30,65)*+HPVAC (12,\$.60)    | 1.22 | 483   | 2,534 | Dominated |
| Pap (3,20,30) & Pap/HPV(3,30,65)*+HPVAC (12,\$.60)+Rx | 1.44 | 999   | 1,447 | Dominated |
| Pap (5,20,30) & Pap/HPV(5,30,65)*+HPVAC (12,\$.60)    | 0.81 | 470   | 1,712 | Dominated |
| Pap (5,20,30) & Pap/HPV(5,30,65)*+HPVAC (12,\$.60)+Rx | 1.03 | 988   | 1,048 | 13,705    |
| Pap (35,40,45)* +HPVAC (12,\$.60)                     | 0.19 | 358   | 521   | Dominated |
| Pap (35,40,45)* +HPVAC (12,\$.60)+Rx                  | 0.50 | 895   | 564   | Dominated |
| HPV (35,40,45)* +HPVAC (12,\$.60)                     | 0.40 | 370   | 1,078 | Dominated |
| HPV (35,40,45)* +HPVAC (12,\$.60)+Rx                  | 0.69 | 904   | 758   | Dominated |
| VIA (35,40,45)* +HPVAC (12,\$.60)                     | 0.40 | 367   | 1,099 | Dominated |
| VIA (35,40,45)* +HPVAC (12,\$.60)+Rx                  | 0.50 | 901   | 550   | 1,675     |

|                                |      |     |     |           |
|--------------------------------|------|-----|-----|-----------|
| Pap (40)* +HPVAC (12,\$.60)    | 0.12 | 306 | 391 | Dominated |
| Pap (40)* +HPVAC (12,\$.60)+Rx | 0.43 | 857 | 497 | 756       |
| HPV (40)* +HPVAC (12,\$.60)    | 0.20 | 318 | 621 | Dominated |
| HPV (40)* +HPVAC (12,\$.60)+Rx | 0.50 | 865 | 579 | Dominated |

### World sub-region Sear-D

|                                                       |      |       |       |           |
|-------------------------------------------------------|------|-------|-------|-----------|
| <b>Current Scenario</b>                               | 0.08 | 207   | 372   | Dominated |
| <b>50% coverage</b>                                   |      |       |       |           |
| Pap (1,20,65)*                                        | 0.49 | 145   | 3,359 | Dominated |
| Pap (3,20,65)*                                        | 0.39 | 125   | 3,088 | Dominated |
| VIA (40)*                                             | 0.05 | 65    | 727   | Dominated |
| Rx                                                    | 0.07 | 390   | 184   | Dominated |
| Pap (1,20,65)* + Rx                                   | 0.55 | 646   | 855   | Dominated |
| Pap (3,20,65)* + Rx                                   | 0.46 | 629   | 737   | Dominated |
| VIA (40)* + Rx                                        | 0.21 | 1,333 | 154   | Dominated |
| Pap (5,20,65)*                                        | 0.26 | 116   | 2,235 | Dominated |
| Pap (5,20,65)* + Rx                                   | 0.35 | 618   | 558   | Dominated |
| Pap (1,20,30) then Pap & HPV (1,30,65)                | 1.33 | 151   | 8,787 | Dominated |
| Pap (1,20,30) then Pap & HPV (1,30,65) + Rx           | 1.37 | 654   | 2,100 | Dominated |
| Pap (3,20,30) then Pap & HPV (3,30,65)                | 0.70 | 134   | 5,254 | Dominated |
| Pap (3,20,30) then Pap & HPV (3,30,65) + Rx           | 0.76 | 638   | 1,196 | Dominated |
| Pap (5,20,30) then Pap & HPV (5,30,65)                | 0.46 | 127   | 3,578 | Dominated |
| Pap (5,20,30) then Pap & HPV (5,30,65) + Rx           | 0.54 | 630   | 850   | Dominated |
| Pap (35,40,45)*.                                      | 0.07 | 89    | 746   | Dominated |
| Pap (35,40,45)* + Rx.                                 | 0.24 | 1,361 | 174   | Dominated |
| HPV (35,40,45)*.                                      | 0.22 | 98    | 2,256 | Dominated |
| HPV (35,40,45)* + Rx                                  | 0.37 | 1,274 | 290   | Dominated |
| VIA (35,40,45)                                        | 0.11 | 96    | 1,150 | Dominated |
| VIA (35,40,45)* + Rx                                  | 0.26 | 1,272 | 204   | Dominated |
| Pap (40)*                                             | 0.03 | 58    | 487   | Dominated |
| Pap (40)* + Rx                                        | 0.19 | 1,327 | 142   | 142       |
| HPV (40)*                                             | 0.09 | 69    | 1,278 | Dominated |
| HPV (40)* + Rx                                        | 0.25 | 1,336 | 184   | Dominated |
| HPVAC(12), \$0.60/vaccine dose                        | 0.03 | 114   | 298   | Dominated |
| HPVAC (12), \$0.60/vaccine dose + Rx                  | 0.15 | 496   | 305   | Dominated |
| HPVAC (12), \$2.00/vaccine dose                       | 0.07 | 114   | 605   | Dominated |
| HPVAC (12), \$2.00/vaccine dose + Rx                  | 0.19 | 496   | 382   | Dominated |
| Pap(1,20,65)*+HPVAC (12,\$.60)                        | 0.48 | 203   | 2,380 | Dominated |
| Pap(3,20,65)*+HPVAC (12,\$.60)                        | 0.40 | 193   | 2,081 | Dominated |
| VIA(40)*+HPVAC (12), \$.60)                           | 0.07 | 141   | 518   | Dominated |
| Pap(1,20,65)*+HPVAC (12, \$.60) + Rx                  | 0.56 | 583   | 953   | Dominated |
| Pap(3,20,65)*+HPVAC (12, \$.60) + Rx                  | 0.48 | 574   | 832   | Dominated |
| VIA(40)*+HPVAC (12, \$.60) + Rx                       | 0.18 | 521   | 338   | Dominated |
| Pap(5,20,65)*+HPVAC (12, \$.60)                       | 0.28 | 187   | 1,505 | Dominated |
| Pap(5,20,65)*+HPVAC (12, \$.60) + Rx                  | 0.36 | 567   | 642   | Dominated |
| Pap (1,20,30) & Pap/HPV(1,30,65)*+HPVAC (12,\$.60)    | 1.33 | 207   | 6,424 | Dominated |
| Pap (1,20,30) & Pap/HPV(1,30,65)*+HPVAC (12,\$.60)+Rx | 1.40 | 589   | 2,378 | Dominated |
| Pap (3,20,30) & Pap/HPV(3,30,65)*+HPVAC (12,\$.60)    | 0.73 | 199   | 3,673 | Dominated |
| Pap (3,20,30) & Pap/HPV(3,30,65)*+HPVAC (12,\$.60)+Rx | 0.80 | 581   | 1,384 | Dominated |
| Pap (5,20,30) & Pap/HPV(5,30,65)*+HPVAC (12,\$.60)    | 0.48 | 195   | 2,482 | Dominated |
| Pap (5,20,30) & Pap/HPV(5,30,65)*+HPVAC (12,\$.60)+Rx | 0.56 | 576   | 974   | Dominated |
| Pap (35,40,45)* +HPVAC (12,\$.60)                     | 0.10 | 156   | 613   | Dominated |
| Pap (35,40,45)* +HPVAC (12,\$.60)+Rx                  | 0.21 | 535   | 384   | Dominated |
| HPV (35,40,45)* +HPVAC (12,\$.60)                     | 0.25 | 160   | 1,567 | Dominated |
| HPV (35,40,45)* +HPVAC (12,\$.60)+Rx                  | 0.35 | 539   | 646   | Dominated |
| VIA (35,40,45)* +HPVAC (12,\$.60)                     | 0.26 | 159   | 1,609 | Dominated |
| VIA (35,40,45)* +HPVAC (12,\$.60)+Rx                  | 0.24 | 538   | 443   | Dominated |

|                                                       |      |       |       |           |
|-------------------------------------------------------|------|-------|-------|-----------|
| Pap (40)* +HPVAC (12,\$.60)                           | 0.06 | 138   | 414   | Dominated |
| Pap (40)* +HPVAC (12,\$.60)+Rx                        | 0.16 | 518   | 310   | Dominated |
| HPV (40)* +HPVAC (12,\$.60)                           | 0.11 | 142   | 810   | Dominated |
| HPV (40)* +HPVAC (12,\$.60)+Rx                        | 0.22 | 522   | 418   | Dominated |
| <b>80% coverage</b>                                   |      |       |       |           |
| Pap (1,20,65)*                                        | 0.76 | 233   | 3,281 | Dominated |
| Pap (3,20,65)*                                        | 0.48 | 201   | 2,391 | Dominated |
| VIA (40)*                                             | 0.05 | 105   | 506   | Dominated |
| Rx                                                    | 0.18 | 965   | 183   | Dominated |
| Pap (1,20,65)* + Rx                                   | 0.94 | 1,248 | 753   | Dominated |
| Pap (3,20,65)* + Rx                                   | 0.67 | 1,225 | 549   | Dominated |
| VIA (40)* + Rx                                        | 0.36 | 1,573 | 229   | Dominated |
| Pap (5,20,65)*                                        | 0.32 | 185   | 1,716 | Dominated |
| Pap (5,20,65)* + Rx                                   | 0.53 | 1,208 | 436   | Dominated |
| Pap (1,20,30) then Pap & HPV (1,30,65)                | 2.12 | 242   | 8,770 | Dominated |
| Pap (1,20,30) then Pap & HPV (1,30,65) + Rx           | 2.22 | 1,266 | 1,756 | Dominated |
| Pap (3,20,30) then Pap & HPV (3,30,65)                | 0.95 | 214   | 4,455 | Dominated |
| Pap (3,20,30) then Pap & HPV (3,30,65) + Rx           | 1.10 | 1,240 | 891   | Dominated |
| Pap (5,20,30) then Pap & HPV (5,30,65)                | 0.61 | 204   | 2,978 | Dominated |
| Pap (5,20,30) then Pap & HPV (5,30,65) + Rx           | 0.80 | 1,227 | 651   | Dominated |
| Pap (35,40,45)*.                                      | 0.09 | 143   | 628   | Dominated |
| Pap (35,40,45)* + Rx.                                 | 0.42 | 1,608 | 259   | Dominated |
| HPV (35,40,45) *.                                     | 0.32 | 157   | 2,009 | Dominated |
| HPV (35,40,45) * + Rx                                 | 0.61 | 1,568 | 386   | Dominated |
| VIA (35,40,45)                                        | 0.12 | 153   | 797   | Dominated |
| VIA (35,40,45) * + Rx                                 | 0.41 | 1,565 | 264   | Dominated |
| Pap (40) *                                            | 0.04 | 93    | 400   | Dominated |
| Pap (40) * + Rx                                       | 0.35 | 1,564 | 222   | Dominated |
| HPV (40) *                                            | 0.12 | 110   | 1,125 | Dominated |
| HPV (40) * + Rx                                       | 0.43 | 1,577 | 272   | Dominated |
| HPVAC(12), \$0.60/vaccine dose                        | 0.05 | 183   | 287   | Dominated |
| HPVAC (12), \$0.60/vaccine dose + Rx                  | 0.35 | 1,122 | 309   | Dominated |
| HPVAC (12), \$2.00/vaccine dose                       | 0.11 | 183   | 594   | Dominated |
| HPVAC (12), \$2.00/vaccine dose + Rx                  | 0.41 | 1,122 | 363   | Dominated |
| Pap(1,20,65)*+HPVAC (12,\$.60)                        | 0.74 | 326   | 2,283 | Dominated |
| Pap(3,20,65)*+HPVAC (12,\$.60)                        | 0.50 | 310   | 1,618 | Dominated |
| VIA(40)*+HPVAC (12), \$.60)                           | 0.09 | 225   | 417   | Dominated |
| Pap(1,20,65)*+HPVAC (12, \$.60) + Rx                  | 0.92 | 1,253 | 731   | Dominated |
| Pap(3,20,65)*+HPVAC (12, \$.60) + Rx                  | 0.69 | 1,242 | 553   | Dominated |
| VIA(40)*+HPVAC (12, \$.60) + Rx                       | 0.35 | 1,157 | 302   | Dominated |
| Pap(5,20,65)*+HPVAC (12, \$.60)                       | 0.35 | 299   | 1,161 | Dominated |
| Pap(5,20,65)*+HPVAC (12, \$.60) + Rx                  | 0.55 | 1,230 | 448   | Dominated |
| Pap (1,20,30) & Pap/HPV(1,30,65)*+HPVAC (12,\$.60)    | 2.10 | 332   | 6,326 | Dominated |
| Pap (1,20,30) & Pap/HPV(1,30,65)*+HPVAC (12,\$.60)+Rx | 2.26 | 1,267 | 1,787 | Dominated |
| Pap (3,20,30) & Pap/HPV(3,30,65)*+HPVAC (12,\$.60)    | 1.00 | 319   | 3,133 | Dominated |
| Pap (3,20,30) & Pap/HPV(3,30,65)*+HPVAC (12,\$.60)+Rx | 1.17 | 1,254 | 936   | Dominated |
| Pap (5,20,30) & Pap/HPV(5,30,65)*+HPVAC (12,\$.60)    | 0.65 | 312   | 2,088 | Dominated |
| Pap (5,20,30) & Pap/HPV(5,30,65)*+HPVAC (12,\$.60)+Rx | 0.84 | 1,245 | 674   | Dominated |
| Pap (35,40,45)* +HPVAC (12,\$.60)                     | 0.13 | 249   | 542   | Dominated |
| Pap (35,40,45)* +HPVAC (12,\$.60)+Rx                  | 0.41 | 1,178 | 345   | Dominated |
| HPV (35,40,45)* +HPVAC (12,\$.60)                     | 0.36 | 255   | 1,412 | Dominated |
| HPV (35,40,45)* +HPVAC (12,\$.60)+Rx                  | 0.60 | 1,184 | 510   | Dominated |
| VIA (35,40,45)* +HPVAC (12,\$.60)                     | 0.37 | 254   | 1,441 | Dominated |
| VIA (35,40,45)* +HPVAC (12,\$.60)+Rx                  | 0.41 | 1,182 | 349   | Dominated |
| Pap (40)* +HPVAC (12,\$.60)                           | 0.08 | 220   | 373   | Dominated |
| Pap (40)* +HPVAC (12,\$.60)+Rx                        | 0.34 | 1,153 | 293   | Dominated |

|                                                       |      |       |       |           |
|-------------------------------------------------------|------|-------|-------|-----------|
| HPV (40)* +HPVAC (12,\$.60)                           | 0.17 | 227   | 736   | Dominated |
| HPV (40)* +HPVAC (12,\$.60)+Rx                        | 0.42 | 1,158 | 364   | Dominated |
| <b>95% coverage</b>                                   |      |       |       |           |
| Pap (1,20,65)*                                        | 0.95 | 276   | 3,424 | Dominated |
| Pap (3,20,65)*                                        |      |       |       |           |
| VIA (40)*                                             | 0.06 | 124   | 458   | Dominated |
| Rx                                                    | 0.27 | 1,507 | 182   |           |
| Pap (1,20,65)* + Rx                                   | 1.22 | 1,766 | 688   |           |
| Pap (3,20,65)* + Rx                                   | 0.84 | 1,744 | 480   | Dominated |
| VIA (40)* + Rx                                        | 0.48 | 1,765 | 269   | 1,240     |
| Pap (5,20,65)*                                        | 0.36 | 220   | 1,617 | Dominated |
| Pap (5,20,65)* + Rx                                   | 0.68 | 1,722 | 392   | Dominated |
| Pap (1,20,30) then Pap & HPV (1,30,65)                | 2.56 | 287   | 8,907 | Dominated |
| Pap (1,20,30) then Pap & HPV (1,30,65) + Rx           | 2.72 | 1,793 | 1,515 | Dominated |
| Pap (3,20,30) then Pap & HPV (3,30,65)                | 1.09 | 255   | 4,283 | Dominated |
| Pap (3,20,30) then Pap & HPV (3,30,65) + Rx           | 1.32 | 1,763 | 748   | Dominated |
| Pap (5,20,30) then Pap & HPV (5,30,65)                | 0.69 | 242   | 2,845 | Dominated |
| Pap (5,20,30) then Pap & HPV (5,30,65) + Rx           | 0.98 | 1,746 | 564   | Dominated |
| Pap (35,40,45)*.                                      | 0.10 | 170   | 608   | Dominated |
| Pap (35,40,45)* + Rx.                                 | 0.55 | 1,803 | 303   | 2,886     |
| HPV (35,40,45)*.                                      | 0.36 | 187   | 1,954 | Dominated |
| HPV (35,40,45)* + Rx                                  | 0.76 | 1,800 | 423   | Dominated |
| VIA (35,40,45)                                        | 0.13 | 182   | 714   | Dominated |
| VIA (35,40,45)* + Rx                                  | 0.53 | 1,796 | 294   | 1,719     |
| Pap (40)*                                             | 0.04 | 111   | 384   | Dominated |
| Pap (40)* + Rx                                        | 0.46 | 1,755 | 264   | 757       |
| HPV (40)*                                             | 0.14 | 130   | 1,091 | Dominated |
| HPV (40)* + Rx                                        | 0.56 | 1,770 | 315   | Dominated |
| HPVAC(12), \$0.60/vaccine dose                        | 0.06 | 217   | 284   | Dominated |
| HPVAC (12), \$0.60/vaccine dose + Rx                  | 0.52 | 1,679 | 311   | Dominated |
| HPVAC (12), \$2.00/vaccine dose                       | 0.13 | 217   | 591   | Dominated |
| HPVAC (12), \$2.00/vaccine dose + Rx                  | 0.60 | 1,679 | 355   | Dominated |
| Pap(1,20,65)*+HPVAC (12,\$.60)                        | 0.90 | 387   | 2,329 | Dominated |
| Pap(3,20,65)*+HPVAC (12,\$.60)                        | 0.56 | 368   | 1,522 | Dominated |
| VIA(40)*+HPVAC (12), \$.60)                           | 0.11 | 267   | 393   | Dominated |
| Pap(1,20,65)*+HPVAC (12, \$.60) + Rx                  | 1.17 | 1,830 | 639   | Dominated |
| Pap(3,20,65)*+HPVAC (12, \$.60) + Rx                  | 0.85 | 1,822 | 467   | 16,051    |
| VIA(40)*+HPVAC (12, \$.60) + Rx                       | 0.50 | 1,717 | 293   | Dominated |
| Pap(5,20,65)*+HPVAC (12, \$.60)                       | 0.39 | 355   | 1,088 | Dominated |
| Pap(5,20,65)*+HPVAC (12, \$.60) + Rx                  | 0.70 | 1,805 | 389   | Dominated |
| Pap (1,20,30) & Pap/HPV(1,30,65)*+HPVAC (12,\$.60)    | 2.51 | 394   | 6,371 | Dominated |
| Pap (1,20,30) & Pap/HPV(1,30,65)*+HPVAC (12,\$.60)+Rx | 2.77 | 1,854 | 1,493 | 81,629    |
| Pap (3,20,30) & Pap/HPV(3,30,65)*+HPVAC (12,\$.60)    | 1.14 | 379   | 3,018 | Dominated |
| Pap (3,20,30) & Pap/HPV(3,30,65)*+HPVAC (12,\$.60)+Rx | 1.41 | 1,837 | 770   | 36,764    |
| Pap (5,20,30) & Pap/HPV(5,30,65)*+HPVAC (12,\$.60)    | 0.74 | 371   | 2,001 | Dominated |
| Pap (5,20,30) & Pap/HPV(5,30,65)*+HPVAC (12,\$.60)+Rx | 1.03 | 1,824 | 567   | Dominated |
| Pap (35,40,45)* +HPVAC (12,\$.60)                     | 0.16 | 296   | 529   | Dominated |
| Pap (35,40,45)* +HPVAC (12,\$.60)+Rx                  | 0.58 | 1,741 | 333   | Dominated |
| HPV (35,40,45)* +HPVAC (12,\$.60)                     | 0.42 | 303   | 1,377 | Dominated |
| HPV (35,40,45)* +HPVAC (12,\$.60)+Rx                  | 0.80 | 1,747 | 456   | Dominated |
| VIA (35,40,45)* +HPVAC (12,\$.60)                     | 0.42 | 301   | 1,403 | Dominated |
| VIA (35,40,45)* +HPVAC (12,\$.60)+Rx                  | 0.57 | 1,745 | 324   | Dominated |
| Pap (40)* +HPVAC (12,\$.60)                           | 0.10 | 262   | 365   | Dominated |
| Pap (40)* +HPVAC (12,\$.60)+Rx                        | 0.49 | 1,712 | 289   | Dominated |
| HPV (40)* +HPVAC (12,\$.60)                           | 0.19 | 270   | 719   | Dominated |
| HPV (40)* +HPVAC (12,\$.60)+Rx                        | 0.59 | 1,718 | 344   | Dominated |

---

Notes:-

Rx: Treatment of invasive cancer including chemotherapy and/or radiotherapy and/or surgery.

\* Including removal of lesions.

(f,Y,z) Screening every f years from age y to age z.

HPVAC (12): Vaccinations against HPV starting at age 12.

(40) Intervention at age 40

(35,40,45) Intervention at ages 35,40 and 45.

## Appendix 5

Annual costs, effects and cost-effectiveness of interventions in colorectal cancer control  
(cost and effects discounted and effects age-weighted)

| Intervention                  | Costs per capita (I\$) | DALYS averted (per mln people) | Cost per DALY |           |
|-------------------------------|------------------------|--------------------------------|---------------|-----------|
|                               |                        |                                | ACER          | ICER      |
| <b>World sub-region Afr-E</b> |                        |                                |               |           |
| <b>Current Scenario</b>       | 0.04                   | 32                             | 1,217         | Dominated |
| <b>50% coverage</b>           |                        |                                |               |           |
| FOB1*                         | 0.51                   | 86                             | 5,920         | Dominated |
| FOB2*                         | 0.28                   | 58                             | 4,797         | Dominated |
| SIG5*                         | 0.33                   | 78                             | 4,265         | Dominated |
| COL10*                        | 0.30                   | 109                            | 2,807         | Dominated |
| SIG5* & FOB1*                 | 0.67                   | 105                            | 6,367         | Dominated |
| FOB(50)*                      | 0.05                   | 10                             | 5,159         | Dominated |
| SIG(50)*                      | 0.09                   | 36                             | 2,576         | Dominated |
| COL(50)*                      | 0.18                   | 78                             | 2,299         | Dominated |
| SIG(50)* & FOB(50) *          | 0.12                   | 40                             | 2,969         | Dominated |
| Rx                            | 0.14                   | 363                            | 382           | Dominated |
| FOB1* + Rx                    | 0.63                   | 459                            | 1,381         | Dominated |
| FOB2* + Rx                    | 0.41                   | 431                            | 946           | Dominated |
| SIG5* + Rx                    | 0.40                   | 437                            | 919           | Dominated |
| COL10* + Rx                   | 0.44                   | 461                            | 945           | Dominated |
| SIG5* & FOB1* + Rx            | 0.55                   | 467                            | 1,172         | Dominated |
| FOB(50)*+ Rx                  | 0.19                   | 383                            | 495           | Dominated |
| SIG(50) + Rx                  | 0.23                   | 402                            | 565           | Dominated |
| COL (50)*+ Rx                 | 0.31                   | 438                            | 712           | Dominated |
| SIG(50)* & FOB(50)*+ Rx       | 0.26                   | 406                            | 631           | Dominated |
| DRE1*                         | 0.10                   | 8                              | 11,787        | Dominated |
| DRE1* + Rx                    | 0.24                   | 377                            | 629           | Dominated |
| Fruit & Veg campaign          | 0.04                   | 3                              | 14,985        | Dominated |
| Fruit & Veg campaign + Rx     | 0.18                   | 274                            | 641           | Dominated |
| <b>80% coverage</b>           |                        |                                |               |           |
| FOB1*                         | 0.82                   | 137                            | 5,977         | Dominated |
| FOB2*                         | 0.45                   | 93                             | 4,816         | Dominated |
| SIG5*                         | 0.53                   | 125                            | 4,219         | Dominated |
| COL10*                        | 0.48                   | 174                            | 2,770         | Dominated |
| SIG5* & FOB1*                 | 1.08                   | 168                            | 6,405         | Dominated |
| FOB(50)*                      | 0.08                   | 17                             | 4,891         | Dominated |
| SIG(50)*                      | 0.14                   | 57                             | 2,467         | Dominated |
| COL(50)*                      | 0.28                   | 125                            | 2,250         | Dominated |
| SIG(50)* & FOB(50) *          | 0.18                   | 64                             | 2,898         | Dominated |
| Rx                            | 0.27                   | 819                            | 336           | 336       |
| FOB1* + Rx                    | 1.07                   | 942                            | 1,132         | Dominated |
| FOB2* + Rx                    | 0.70                   | 907                            | 775           | Dominated |
| SIG5* + Rx                    | 0.68                   | 908                            | 754           | Dominated |



|                           |      |       |        |           |
|---------------------------|------|-------|--------|-----------|
| COL10* + Rx               | 0.74 | 936   | 787    | Dominated |
| SIG5* & FOBT1* + Rx       | 0.93 | 950   | 976    | Dominated |
| FOB(50)*+ Rx              | 0.35 | 842   | 419    | Dominated |
| SIG(50) + Rx              | 0.41 | 865   | 474    | Dominated |
| COL (50)*+ Rx             | 0.54 | 911   | 598    | Dominated |
| SIG(50)* & FOB(50)*+ Rx   | 0.46 | 872   | 527    | Dominated |
| DRE1*                     | 0.15 | 13    | 11,305 | Dominated |
| DRE1* + Rx                | 0.43 | 833   | 516    | Dominated |
| Fruit & Veg campaign      | 0.06 | 8     | 8,375  | Dominated |
| Fruit & Veg campaign + Rx | 0.33 | 708   | 463    | Dominated |
| <b>95% coverage</b>       |      |       |        |           |
| FOB1*                     | 0.98 | 154   | 6,358  | Dominated |
| FOB2*                     | 0.53 | 104   | 5,114  | Dominated |
| SIG5*                     | 0.63 | 141   | 4,443  | Dominated |
| COL10*                    | 0.57 | 196   | 2,915  | Dominated |
| SIG5* & FOB1*             | 1.29 | 190   | 6,797  | Dominated |
| FOB(50)*                  | 0.10 | 19    | 5,121  | Dominated |
| SIG(50)*                  | 0.17 | 64    | 2,576  | Dominated |
| COL(50)*                  | 0.33 | 140   | 2,362  | Dominated |
| SIG(50)* & FOB(50) *      | 0.22 | 72    | 3,047  | Dominated |
| Rx                        | 0.36 | 1,066 | 336    | 337       |
| FOB1* + Rx                | 1.30 | 1,185 | 1,098  | Dominated |
| FOB2* + Rx                | 0.87 | 1,151 | 752    | Dominated |
| SIG5* + Rx                | 0.84 | 1,150 | 731    | Dominated |
| COL10* + Rx               | 0.90 | 1,177 | 766    | 9,598     |
| SIG5* & FOBT1* + Rx       | 1.13 | 1,192 | 952    | 15,548    |
| FOB(50)*+ Rx              | 0.45 | 1,088 | 413    | Dominated |
| SIG(50) + Rx              | 0.52 | 1,109 | 465    | Dominated |
| COL (50)*+ Rx             | 0.67 | 1,153 | 585    | 3,630     |
| SIG(50)* & FOB(50)*+ Rx   | 0.58 | 1,116 | 516    | Dominated |
| DRE1*                     | 0.18 | 15    | 11,841 | Dominated |
| DRE1* + Rx                | 0.54 | 1,079 | 503    | Dominated |
| Fruit & Veg campaign      | 0.08 | 10    | 8,579  | Dominated |
| Fruit & Veg campaign + Rx | 0.43 | 979   | 443    | Dominated |

---

**World sub-region Sear-D**

|                         |      |    |        |           |
|-------------------------|------|----|--------|-----------|
| <b>Current Scenario</b> | 0.05 | 69 | 694    | Dominated |
| <b>50% coverage</b>     |      |    |        |           |
| FOB1*                   | 0.70 | 53 | 13,069 | Dominated |
| FOB2*                   | 0.38 | 36 | 10,476 | Dominated |
| SIG5*                   | 0.42 | 49 | 8,685  | Dominated |
| COL10*                  | 0.39 | 65 | 5,982  | Dominated |
| SIG5* & FOB1*           | 0.90 | 65 | 13,857 | Dominated |

|                           |      |     |        |           |
|---------------------------|------|-----|--------|-----------|
| FOB(50)*                  | 0.07 | 6   | 10,701 | Dominated |
| SIG(50)*                  | 0.11 | 22  | 5,002  | Dominated |
| COL(50)*                  | 0.23 | 47  | 4,806  | Dominated |
| SIG(50)* & FOB(50) *      | 0.15 | 24  | 6,245  | Dominated |
| Rx                        | 0.12 | 274 | 425    | Dominated |
| FOB1* + Rx                | 0.80 | 336 | 2,396  | Dominated |
| FOB2* + Rx                | 0.49 | 319 | 1,534  | Dominated |
| SIG5* + Rx                | 0.45 | 321 | 1,407  | Dominated |
| COL10* + Rx               | 0.50 | 333 | 1,505  | Dominated |
| SIG5* & FOBT1* + Rx       | 0.69 | 341 | 2,012  | Dominated |
| FOB(50)*+ Rx              | 0.18 | 288 | 633    | Dominated |
| SIG(50) + Rx              | 0.22 | 299 | 744    | Dominated |
| COL (50)*+ Rx             | 0.34 | 321 | 1,052  | Dominated |
| SIG(50)* & FOB(50)*+ Rx   | 0.28 | 302 | 931    | Dominated |
| DRE1*                     | 0.10 | 5   | 19,935 | Dominated |
| DRE1* + Rx                | 0.26 | 284 | 901    | Dominated |
| Fruit & Veg campaign      | 0.02 | 1   | 14,818 | Dominated |
| Fruit & Veg campaign + Rx | 0.13 | 194 | 653    | Dominated |

**80% coverage**

|                           |      |     |        |           |
|---------------------------|------|-----|--------|-----------|
| FOB1*                     | 1.26 | 86  | 14,696 | Dominated |
| FOB2*                     | 0.67 | 58  | 11,685 | Dominated |
| SIG5*                     | 0.68 | 78  | 8,770  | Dominated |
| COL10*                    | 0.63 | 104 | 5,998  | Dominated |
| SIG5* & FOB1*             | 1.59 | 104 | 15,182 | Dominated |
| FOB(50)*                  | 0.12 | 10  | 11,938 | Dominated |
| SIG(50)*                  | 0.17 | 35  | 4,944  | Dominated |
| COL(50)*                  | 0.36 | 75  | 4,792  | Dominated |
| SIG(50)* & FOB(50) *      | 0.25 | 39  | 6,566  | Dominated |
| Rx                        | 0.23 | 598 | 387    | Dominated |
| FOB1* + Rx                | 1.47 | 676 | 2,171  | Dominated |
| FOB2* + Rx                | 0.89 | 654 | 1,368  | Dominated |
| SIG5* + Rx                | 0.77 | 653 | 1,182  | Dominated |
| COL10* + Rx               | 0.85 | 666 | 1,269  | Dominated |
| SIG5* & FOBT1* + Rx       | 1.27 | 679 | 1,876  | Dominated |
| FOB(50)*+ Rx              | 0.35 | 613 | 571    | Dominated |
| SIG(50) + Rx              | 0.40 | 626 | 638    | Dominated |
| COL (50)*+ Rx             | 0.58 | 652 | 891    | Dominated |
| SIG(50)* & FOB(50)*+ Rx   | 0.52 | 630 | 828    | Dominated |
| DRE1*                     | 0.17 | 8   | 21,306 | Dominated |
| DRE1* + Rx                | 0.50 | 608 | 828    | Dominated |
| Fruit & Veg campaign      | 0.02 | 3   | 7,586  | Dominated |
| Fruit & Veg campaign + Rx | 0.24 | 505 | 483    | Dominated |

**95% coverage**

|                  |      |    |     |           |
|------------------|------|----|-----|-----------|
| Current Scenario | 0.05 | 69 | 694 | Dominated |
|------------------|------|----|-----|-----------|

|                          |      |     |        |           |
|--------------------------|------|-----|--------|-----------|
| FOB1*                    | 1.58 | 102 | 15,525 | Dominated |
| FOB2*                    | 0.84 | 69  | 12,304 | Dominated |
| SIG5*                    | 0.81 | 92  | 8,824  | Dominated |
| COL10*                   | 0.74 | 124 | 6,014  | Dominated |
| SIG5* & FOB1*            | 1.97 | 124 | 15,859 | Dominated |
| FOB(50)*                 | 0.15 | 12  | 12,633 | Dominated |
| SIG(50)*                 | 0.20 | 41  | 4,938  | Dominated |
| COL(50)*                 | 0.43 | 89  | 4,795  | Dominated |
| SIG(50)* & FOB(50)*      | 0.31 | 46  | 6,747  | Dominated |
| Rx                       | 0.31 | 868 | 362    | 362       |
| FOB1* + Rx               | 1.86 | 936 | 1,985  | Dominated |
| FOB2* + Rx               | 1.14 | 917 | 1,242  | Dominated |
| SIG5* + Rx               | 0.96 | 915 | 1,046  | Dominated |
| COL10* + Rx              | 1.04 | 926 | 1,124  | 28,017    |
| SIG5* & FOB1* + Rx       | 1.63 | 939 | 1,735  | 42,940    |
| FOB(50)* + Rx            | 0.46 | 880 | 525    | Dominated |
| SIG(50) + Rx             | 0.51 | 891 | 574    | 8,291     |
| COL (50)* + Rx           | 0.73 | 914 | 794    | 9,318     |
| SIG(50)* & FOB(50)* + Rx | 0.67 | 895 | 753    | Dominated |
| DRE1*                    | 0.22 | 10  | 22,133 | Dominated |
| DRE1* + Rx               | 0.67 | 875 | 761    | Dominated |
| Fruit & Veg campaign     | 0.03 | 5   | 6,903  | Dominated |

Notes:

\* Includes surgical removal of polyps.

Rx: Treatment of invasive cancer including chemotherapy and/or radiotherapy and/or surgery.

ZZZY denotes screening with intervention ZZZ every Y years

(x) denotes screening at age "x"

FOB: Fecal Occult Blood Test

SIG: Sigmoidoscopy

COL: Colonoscopy

DRE : Digital Rectal Examination

## Appendix 6

Annual costs, effects and cost-effectiveness of interventions in breast cancer control (cost and effects discounted and effects age-weighted)

| Intervention                   | Costs per capita (I\$) | DALYS averted (per mln people) | Cost per DALY |           |
|--------------------------------|------------------------|--------------------------------|---------------|-----------|
|                                |                        |                                | ACER          | ICER      |
| <b>World sub-region Afr-E</b>  |                        |                                |               |           |
| Stage I treatment 50%          | 0,11                   | 28                             | 3.800         | Dominated |
| Stage II treatment 50%         | 0,12                   | 15                             | 7.855         | Dominated |
| Stage III treatment 50%        | 0,22                   | 44                             | 5.042         | Dominated |
| Stage IV treatment 50%         | 0,11                   | 2                              | 51.767        | Dominated |
| Treatment all stages 50%       | 0,32                   | 87                             | 3.705         | Dominated |
| Optimal program 50%            | 0,68                   | 303                            | 2.248         | 2.248     |
| Stage I treatment 80%          | 0,17                   | 45                             | 3.686         | Dominated |
| Stage II treatment 80%         | 0,18                   | 24                             | 7.640         | Dominated |
| Stage III treatment 80%        | 0,35                   | 70                             | 4.974         | Dominated |
| Stage IV treatment 80%         | 0,17                   | 3                              | 50.221        | Dominated |
| Treatment all stages 80%       | 0,51                   | 140                            | 3.661         | Dominated |
| Optimal program 80%            | 1,09                   | 485                            | 2.253         | 2.261     |
| Stage I treatment 95%          | 0,19                   | 54                             | 3.610         | Dominated |
| Stage II treatment 95%         | 0,21                   | 28                             | 7.496         | Dominated |
| Stage III treatment 95%        | 0,41                   | 84                             | 4.929         | Dominated |
| Stage IV treatment 95%         | 0,20                   | 4                              | 49.218        | Dominated |
| Treatment all stages 95%       | 0,61                   | 166                            | 3.690         | Dominated |
| Optimal program 95%            | 1,34                   | 576                            | 2.323         | 2.696     |
| <b>World sub-region Sear-D</b> |                        |                                |               |           |
| Stage I treatment 50%          | 0,08                   | 19                             | 4.548         | Dominated |
| Stage II treatment 50%         | 0,11                   | 11                             | 9.802         | Dominated |
| Stage III treatment 50%        | 0,18                   | 35                             | 5.032         | Dominated |
| Stage IV treatment 50%         | 0,09                   | 2                              | 49.891        | Dominated |
| Treatment all stages 50%       | 0,30                   | 65                             | 4.569         | Dominated |
| Optimal program 50%            | 0,87                   | 201                            | 4.338         | 4.338     |
| Stage I treatment 80%          | 0,13                   | 30                             | 4.479         | Dominated |
| Stage II treatment 80%         | 0,17                   | 18                             | 9.717         | Dominated |
| Stage III treatment 80%        | 0,28                   | 57                             | 4.997         | Dominated |
| Stage IV treatment 80%         | 0,14                   | 3                              | 49.169        | Dominated |
| Treatment all stages 80%       | 0,47                   | 105                            | 4.534         | Dominated |
| Optimal program 80%            | 1,40                   | 321                            | 4.362         | 4.401     |
| Stage I treatment 95%          | 0,15                   | 35                             | 4.362         | Dominated |
| Stage II treatment 95%         | 0,20                   | 21                             | 9.494         | Dominated |
| Stage III treatment 95%        | 0,33                   | 67                             | 4.937         | Dominated |

|                          |      |     |        |           |
|--------------------------|------|-----|--------|-----------|
| Stage IV treatment 95%   | 0,16 | 3   | 47.947 | Dominated |
| Treatment all stages 95% | 0,56 | 124 | 4.533  | Dominated |
| Optimal program 95%      | 1,68 | 381 | 4.399  | 4.596     |

---
