# Supplementary material
Source: PubMed Central journal article supplement (PMC4789983)
Supplement: ging856112.ww3_default.pdf [file ging856112.ww3_default.pdf]

## Appendix 7

Sensitivity analysis on discounting and age-weighting, in Afr-E and Sear-D<sup>a</sup>

### Afr-E

| Interventions                                                                                             | Coverage level | Incremental CER (age weighted, discounted) <sup>b</sup> | Incremental CER (not age weighted, discounted) | Incremental CER (not age weighted, undiscounted) |
|-----------------------------------------------------------------------------------------------------------|----------------|---------------------------------------------------------|------------------------------------------------|--------------------------------------------------|
| <b>Breast Cancer</b>                                                                                      |                |                                                         |                                                |                                                  |
| BRE-6: Optimal program (treatment of Stages I-IV breast cancer, plus biannual mammographic screening)     | 50%            | 2,248                                                   | 2,011                                          | 529                                              |
| BRE-12: Optimal program (treatment of Stages I-IV breast cancer, plus biannual mammographic screening)    | 80%            | 2,253                                                   | 2,022                                          | 532                                              |
| BRE-18: Optimal program (treatment of Stages I-IV breast cancer, plus biannual mammographic screening)    | 95%            | 2,323                                                   | 2,411                                          | 634                                              |
| <b>Cervical Cancer</b>                                                                                    |                |                                                         |                                                |                                                  |
| CVC-129: PAP at age 40 with lesion removal and cancer treatment                                           | 50%            | 307                                                     | Dominated                                      | Dominated                                        |
| CVC-4: Treatment of invasive cancer consisting of Surgery &/or Chemotherapy &/or Radiotherapy             | 95%            | 702                                                     | 602                                            | Dominated                                        |
| CVC-51: PAP at age 40 +Waning HPV at age 12 costing \$0.60 per vaccine dose + treatment                   | 95%            | 756                                                     | Dominated                                      | Dominated                                        |
| CVC-35: VIA at age 40 +Waning HPV at age 12 costing \$0.60 per vaccine dose + treatment                   | 95%            | 972                                                     | Dominated                                      | 438                                              |
| CVC-49: VIA (35,40,45)+Waning HPV at age 12 costing \$0.60 per vaccine dose + treatment                   | 95%            | 1,675                                                   | 3,422                                          | 714                                              |
| CVC-37: PAP(5,20,65)+Waning HPV at age 12 costing \$0.60 per vaccine dose + treatment                     | 95%            | 3,906                                                   | 3,663                                          | 1,856                                            |
| CVC-34: PAP(3,20,65)+Waning HPV at age 12 costing \$0.60 per vaccine dose + treatment                     | 95%            | 12,425                                                  | Dominated                                      | Dominated                                        |
| CVC-43: PAP (5,20,30) & PAP/HPV(5,30,65)+Waning HPV at age 12 costing \$0.60 per vaccine dose + treatment | 95%            | 13,705                                                  | 10,350                                         | 5,718                                            |
| CVC-33: PAP(1,20,65)+Waning HPV at age 12 costing \$0.60 per vaccine dose + treatment                     | 95%            | 27,139                                                  | 33,256                                         | 13,270                                           |
| CVC-39: PAP (1,20,30) & PAP/HPV(1,30,65)+Waning HPV at age 12 costing \$0.60 per vaccine dose + treatment | 95%            | 100,075                                                 | 91,187                                         | 50,966                                           |
| CVC-7: VIA at age 40 with lesion removal and cancer treatment                                             | 95%            | Dominated                                               | 682                                            | Dominated                                        |
| CVC-21: VIA (35,40,45) with lesion removal and cancer treatment                                           | 95%            | Dominated                                               | 702                                            | Dominated                                        |
| CVC-22: PAP at age 40 with lesion removal                                                                 | 95%            | Dominated                                               | 273                                            | 157                                              |
| CVC-26:Waning HPV at age 12 costing \$0.60 per vaccine dose                                               | 95%            | Dominated                                               | Dominated                                      | 269                                              |
| CVC-32: VIA at age 40 +Waning HPV at age 12 costing \$0.60 per vaccine dose                               | 95%            | Dominated                                               | Dominated                                      | 424                                              |
| CVC-50: PAP at age 40 +Waning HPV at age 12 costing \$0.60 per vaccine dose                               | 95%            | Dominated                                               | Dominated                                      | 298                                              |
| <b>Colorectal Cancer</b>                                                                                  |                |                                                         |                                                |                                                  |
| CRC-35: Treatment consisting of Surgery &/or Chemotherapy &/or Radiotherapy                               | 80%            | 336                                                     | 274                                            | 54                                               |
| CRC-10: Treatment consisting of Surgery &/or Chemotherapy &/or Radiotherapy                               | 95%            | 337                                                     | 271                                            | 53                                               |
| CRC-18: Colonoscopy at age 50 & surgical removal of polyps + treatment                                    | 95%            | 3,630                                                   | 2,751                                          | 490                                              |
| CRC-14: Colonoscopy screening every 10 years & surgical removal of polyps + treatment                     | 95%            | 9,598                                                   | 4,698                                          | 756                                              |
| CRC-15: Sigmoidoscopy screening every 5 years and FOB annually & surgical removal of polyps + treatment   | 95%            | 15,548                                                  | 10,030                                         | 1,969                                            |

|                                                                          |     |           |       |           |
|--------------------------------------------------------------------------|-----|-----------|-------|-----------|
| CRC-17: Sigmoidoscopy at age 50 & surgical removal of polyps + treatment | 95% | Dominated | 2,724 | Dominated |
|--------------------------------------------------------------------------|-----|-----------|-------|-----------|

#### Sear-D

| Interventions                                                                                             | Coverage level | Incremental CER (age weighted, discounted) <sup>b</sup> | Incremental CER (not age weighted, discounted) | Incremental CER (not age weighted, undiscounted) |
|-----------------------------------------------------------------------------------------------------------|----------------|---------------------------------------------------------|------------------------------------------------|--------------------------------------------------|
| <b>Breast Cancer</b>                                                                                      |                |                                                         |                                                |                                                  |
| BRE-06: Optimal program (treatment of Stages I-IV breast cancer, plus biannual mammographic screening)    | 50%            | 4,338                                                   | 3,915                                          | Dominated                                        |
| BRE-12: Optimal program (treatment of Stages I-IV breast cancer, plus biannual mammographic screening)    | 80%            | 4,362                                                   | 3,938                                          | Dominated                                        |
| BRE-18: Optimal program (treatment of Stages I-IV breast cancer, plus biannual mammographic screening)    | 95%            | 4,402                                                   | 4,148                                          | 1,281                                            |
| BRE-13: treatment of Stage I                                                                              | 95%            | Dominated                                               | Dominated                                      | 798                                              |
| <b>Cervical Cancer</b>                                                                                    |                |                                                         |                                                |                                                  |
| CVC-129: PAP at age 40 with lesion removal and cancer treatment .                                         | 50%            | 142                                                     | 190                                            | 152                                              |
| CVC-4: Treatment of invasive cancer consisting of Surgery &/or Chemotherapy &/or Radiotherapy             | 95%            | 477                                                     | 334                                            | 304                                              |
| CVC-23: PAP at age 40 with lesion removal and cancer treatment                                            | 95%            | 757                                                     | 861                                            | Dominated                                        |
| CVC-7: VIA at age 40 with lesion removal and cancer treatment                                             | 95%            | 1,240                                                   | 962                                            | Dominated                                        |
| CVC-21: VIA inspection at ages 35,40,45 with lesion removal and cancer treatment                          | 95%            | 1,719                                                   | 1,198                                          | Dominated                                        |
| CVC-17: PAP smear at ages 35,40,45 with lesion removal and cancer treatment                               | 95%            | 2,886                                                   | Dominated                                      | Dominated                                        |
| CVC-34: PAP(3,20,65)+Waning HPV at age 12 costing \$0.60 per vaccine dose + treatment                     | 95%            | 16,051                                                  | 8,272                                          | 4,722                                            |
| CVC-41: PAP (3,20,30) & PAP/HPV(3,30,65)+Waning HPV at age 12 costing \$0.60 per vaccine dose + treatment | 95%            | 36,764                                                  | 38,425                                         | Dominated                                        |
| CVC-39: PAP (1,20,30) & PAP/HPV(1,30,65)+Waning HPV at age 12 costing \$0.60 per vaccine dose + treatment | 95%            | 81,629                                                  | 94,733                                         | 51,181                                           |
| CVC-34: PAP (3,20,65)+Waning HPV at age 12 costing \$0.60 per vaccine dose + treatment                    | 95%            | Dominated                                               | 28,547                                         | 10,858                                           |
| CVC-37: PAP(5,20,65)+Waning HPV at age 12 costing \$0.60 per vaccine dose + treatment                     | 95%            | Dominated                                               | 8,114                                          | 1,173                                            |
| CVC-27: Waning HPV at age 12 costing \$0.60 per vaccine dose                                              | 95%            | Dominated                                               | Dominated                                      | 145                                              |
| CVC-35: VIA at age 40+Waning HPV at age 12 costing \$0.60 per vaccine dose + treatment                    | 95%            | Dominated                                               | Dominated                                      | 816                                              |
| CVC-49: VIA (35,40,45)+Waning HPV at age 12 costing \$0.60 per vaccine dose + treatment                   | 95%            | Dominated                                               | Dominated                                      | 937                                              |
| CVC-50: PAP at age 40+Waning HPV at age 12 costing \$0.60 per vaccine dose                                | 95%            | Dominated                                               | Dominated                                      | 473                                              |
| <b>Colorectal Cancer</b>                                                                                  |                |                                                         |                                                |                                                  |
| CRC-10: Treatment consisting of Surgery &/or Chemotherapy &/or Radiotherapy                               | 95%            | 362                                                     | 278                                            | 65                                               |
| CRC-17: Sigmoidoscopy at age 50 & surgical removal of polyps + treatment                                  | 95%            | 8,291                                                   | 6,092                                          | 1,257                                            |
| CRC-18: Colonoscopy at age 50 & surgical removal of polyps + treatment                                    | 95%            | 9,318                                                   | 6,874                                          | 1,340                                            |
| CRC-14: Colonoscopy screening every 10 years & surgical removal of polyps + treatment                     | 95%            | 28,017                                                  | 12,198                                         | 1,975                                            |
| CRC-15: Sigmoidoscopy Screening every 5 years and FOB annually & surgical removal of polyps and treatment | 95%            | 42,940                                                  | 29,741                                         | 7,528                                            |

<sup>a</sup> Table only shows incremental CERs, and lists interventions that are dominant in any of the three analysis.

<sup>b</sup> Baseline, corresponds to results in Tables 2 and 3.
